# Supplementary material for: Novel DNM1L variants impair mitochondrial dynamics through divergent mechanisms
Source: Life Sci Alliance. 2022 Aug 1;5(12):e202101284. doi: 10.26508/lsa.202101284 (PMC9354038; doi:10.26508/lsa.202101284)
Supplement: Supplementary file 1 [file LSA-2021-01284_TableS1.xlsx]

## Sheet: Sheet1
DNM1L variants (cDNA)	DRP1 variants (protein)	RefSeq/Isoform	Inheritence/Zygosity	Domain	Age of onset/diagnosis	Age of death	Cellular/Biochemical Findings	Symptoms	Diagnostics Performed/Major Findings	Citations
c.5A>C	p.Glu2Ala	NM_012062.5 NP_036192.2 (isoform 1)	Heterozygous dominant	GTPase	Range of ages (10-49)	Not lethal	No differences in DRP1 expression levels. Mutant DRP1 formed aggregates in cells. Elongated mitochondria. No change in peroxisome morphology or respiratory parameters.	Central scotoma, moderate color vision defects, one patient with hearing loss.	Visual acuity, full neurological and fundus exams. Decreased retinal nerve fiber layer thickness.	Gerber et al. (2017)
c.95G>C	p.Gly32Ala	Not stated	De novo heterozygous dominant	GTPase	Early childhood	Unknown, not lethal in childhood	Patient-derived fibroblasts had highly connected mitochondrial networks. Variant displayed strong dominant negative effects. Cellular DRP1 primarily cytosolic suggesting it can't be recruited and/or has impaired assembly. No effects on peroxisomal fission.	Microcephaly with dysmorphic facies, optic atrophy, and nystagmus. Muscle tone abnormalities. Ataxia and failure to thrive. Developmental delay with regression and hypotonia. Progressive scoliois and short stature.	Abnormal nerve conduction. Elevated lactate + long chain fatty acids. Normal respiratory chain enzymology studies.	Whitley et al. (2018)
c.106A>G, c.346_347delGA	p.Ser36Gly;p.Glu116Lysfs*6	NM_012062.5 NP_036192.2 (isoform 1)	Bi-allelic	GTPase	Both patients with notable abnormalities at 1 year. Patient 1 diagnosed as teenager. Patient 2 diagnosed at 3 years of age.	Both patients alive at time of publication	Decreased amount of DRP1 by western blot. Elongated mitochondrial networks with decreased DRP1 localization to the mitochondria. Abnormal peroxisomal fission. Overexpression of WT DRP1 in patient fibroblasts corrected impaired mitochondrial fission.	Psychomotor delay, impaired gait, ocular and cerebellar involvement.	Lactic acidosis in patient 1 starting at age 12. Other biochemical tests normal. No evidence of peroxisomal disorder.	Nasca et al. (2016)
c.116G>A	p.Ser39Asn	NM_012062.5 NP_036192.2 (isoform 1)	De novo heterozygous dominant	GTPase	5 months with possible signs of paroxysmal hypertonia at 1 month	Alive at time of publication	Not performed.	Motor and cognitive delay. Microcephaly, high palatine arch, small penis, and small hands and feet. Paroxysmal hypertonia with negative limb deep reflexes.	MRI: ventricular broadening and left lateral fissure widening. EEG: Paroxysmal limb rigidity with no epileptiform discharges. Liver and renal function tests, myocardial enzyme, and ceruloplasmin levels normal. Mild ketonuria and hyperlactacidemia.	Liu et al. (2021)
c.261dup, c.385_386del	p.Trp88Met, p.Glu129Lys	NM_001278464 NP_001265393.1 (isoform 5): Yoon et al. (2016) NM_001278465.2 NP_001265394.1 (isoform 6): Hogarth et al. (2018)	Compound heterozygous	GTPase	Shortly after birth	26 days	Decreased total DRP1 (~70% compared to WT). Likely splice variant lacking exon 3. Elongated mitochondria with fewer branch points. Decreased DRP1 assembly. 30% reduced mtDNA, 30% of normal oxygen consumption rate (OCR), impaired cell growth (Hogarth et al., 2018)	Hypotonia, no respiratory effort post-delivery, no spontaneous movements or deep tendon reflexes. Neuropathology evaluation at autospy revealed brain and spinal cord neurons with intracytoplasmic hyaline eosinophilic granules. Hippocampal neurons and purkinje cells had giant mitochondria. Spinal cord and posterior roots had reduced myelination. (Yoon et al., 2016)	Imaging, EEG, and ECG normal (Yoon et al., 2016). Metabolic testing normal (Hogarth et al., 2018).	Yoon et al. (2014) Yoon et al. (2016) Hogarth et al. (2018)
c.305C>T	p.Thr115Met	NM_012062.5 NP_036192.2 (isoform 1)	Homozygous recessive	GTPase	Infant	Alive at time of publication (4 years of age)	Elongated mitochondrial networks with fewer branch points. 60% reduced mtDNA, 60% of normal OCR, and impaired cell growth.	Hypotonia, developmental delays, and abnormal movements. Nearly normal developmental milestones until 1 year then exhibited developmental regression.	MRI: bilateral symmetrical restriction of diffusion in dark grey matter.	Hogarth et al. (2018)
c.436G>A	p.Asp146Asn	NM_012062.5 NP_036192.2 (isoform 1)	De novo heterozygous	GTPase	Evaluated at 20 months	Alive at time of publication (5 years of age)	Patient fibroblasts with hyperfused and balloon like mitochondria. Significantly elongated peroxisomes and increased peroxisomal turnover. Decreased mitophagy despite normal autophagic flux.	Psychomotor development delay, global hypotonia, and severe ataxia due to axonal sensory neuropathy.	MRI: normal. Serum lactate slightly elevated. Other biochemical tests normal. Nerve conduction study and muscle biopsy performed and were inconclusive.	Longo et al. (2020)
c.445G>A	p.Gly149Arg	Not stated	De novo heterozygous	GTPase	4.5 years	Alive at time of publication	Not performed.	Psychomotor delay evident by 3 months of age. Missed motor milestones. Strabismus at 1.5 years of age that disappeared at 2 years of age. Bilateral weakness of lower legs necessitating assistance to ambulate. Mild cognitive impairment with dysarthria. Bilateral everted feet. No involuntary movements. Deep tendon reflexes absent. Mild appendicular ataxia.	Blood chemistry and hematological testing normal. EEG, EKG, and eye exam normal. Motor nerves intact. Markedly reduced sensory nerve action potentials in upper extremities. MRI: mildly prolonged periventricular white matter relaxation indicating delayed myelination and thinning of the corpus callosum.	Wei et al. (2021)
c.575C>A	p.Ala192Glu	NM_012062.5 NP_036192.2 (isoform 1)	Heterozygous dominant	GTPase	Range of ages (10-49)	Not lethal	No differences in DRP1 expression levels. Mutant DRP1 formed aggregates in cells. Elongated mitochondria. No change in peroxisome morphology or respiratory parameters.	Central scotoma, slow worsening of visual acuity, and moderate color vision defects. Optic nerve pallor. Development of dyschromatopsia without axis.	Electroretinogram recordings normal but became altered during visual evoked potential recordings.	Gerber et al. (2017) Barbet et al. (2005)
c.668G>T	p.Gly223Val	NM_012062.5 NP_036192.2 (isoform 1)	De novo heterozygous dominant	GTPase	2.5 years	Alive at time of publication	Abnormally elongated mitochondria and aberrant peroxisomes. Mixed population with hyperfused mitochondria plus swollen/rod shaped mitochondria. Yeast assay showed impaired growth.	Normal development and milestones during first year of life. At 2.5 years of age developed generalized clonic seizures. At 6 years developed a 50-day episode of super-refractory status eplipeticus (SRSE).	MRI at 2.5 years: T2 hyperintensities in the posterior white matter regions and cortical areas. MRI at 6 years: Moderate global cerebral and cerebellar atrophy. EEG: High amplitude theta-delta activity, lateralized to the left side. Muscle biopsy showed abnormal distribution of mitochondria in a core like pattern.	Verrigni et al. (2019)
c.687_689dupATT	p.Leu230dup	NM_012062.5 NP_036192.2 (isoform 1)	De novo heterozygous	GTPase	6 years	20 years	Mitochondrial networks stained with TMRM appeared elongated with fewer branch points, but differences were not statistically significant using MiNa analysis. Immunoflorescence analysis of mitochondrial and peroxisomal network showed significant network elongation. Normal mitochondrial and peroxisomal recruitment.	Chronic ataxia and mild learning difficulties. Left sided chorea. At 11 years of age had 3 tonic clonic seizures. From ages 12-16 was admitted numerous times for status post epilepticus and epilepsy partialis continua. Also had moderately frequent focal seiures without LOC. Developed noctural enuresis at 12 years of age. Progressive deterioration of gait, dysarthria, and dysphagia. Motor axonal n…	MRI: myositis ossificans in leg. Brain MRI normal initially but later showed cerebellar atrophy and mild atrophy of the cerebral hemispheres. Persistent lymphopenia. Bloodwork, CSF analysis, blood glucose, and urinalysis normal.	Nolden et al. (2022)
Not stated	p.Gly350Asp	Not stated	NA	Middle	NA	NA	GFP tagged DRP1G350D localized primarily in the cytosol, suggesting it can't be recruited to mitochondria.	NA	NA	Chang et al. (2010) Whitley et al. (2018)
c.1048G>A	p.Gly350Arg	Not stated	De novo heterozygous dominant	Middle	14 months	5 years	Mitochondrial pleomorphism with lipid accumulation. Longer than normal peroxisomes. Mitochondrial network elongation.	Normal development until 5 months when the patient developed seizures and developmental regression. Global developmental delays, hypotonia, and status post epilepticus.	MRI: progressive volume loss and demyelination. Serum lactate elevated at 4 years. Very long chain fatty acids (VLCFA) normal.	Chao et al. (2016)
c.1084G>A (both studies)	p.Gly362Ser	NM_001278463.2 NP_001265392.1 (isoform 4): Sheffer et al. (2016) NM_012062.5 NP_036192.2 (isoform 1): Verrigni et al. (2019)	De novo heterozygous dominant	Middle	2 years	Alive at time of publication	Impaired mitochondrial fission, decreased complex IV activity (other complexes normal), and normal peroxisomal morphology/fission. Expression in human skin fibroblasts caused collapse of mitochondrial networks (Sheffer et al., 2016). "Dot" like mitochondria. Yeast assay showed impaired growth (Verrigni et al., 2019).	Microcephaly, developmental delay, minimal spontaneous movement, and self-induced injuries due to pain insensitivity. Decreased muscle tone (Sheffer et al., 2016). Developmental delay, failure to thrive, and self-induced injuries due to pain insensitivity. At 2 years, developed prolonged clonic seizures. Short stature, dysphasia, extra-pyramidal signs, dystonic posturing, dyskinesias and athetoid…	EEG, ECG, echocardiography, auditory brainstem response, and opthalmological examination normal. MRI at 2 years: mildly prolonged white matter relaxation in periventricular white matter suggestive of delayed myelination. Muscle biopsy unremarkable. Plasma lactate mildly elevated. Phytanic acid, pristanic acid, uric acid, and VLCFA normal (Sheffer et al., 2016). EEG: tonic seizures. MRI: thin corp…	Sheffer et al. (2016) Verrigni et al. (2019)
c.1085G>A	p.Gly362Asp	NM_012062.5 NP_036192.2 (isoform 1)	De novo heterozygous dominant	Middle	6 months	Alive at time of publication	No evidence of mitochondrial bioenergetic dysfunction. Patient fibroblasts showed elongated and more connected mitochondrial networks.	Less severe phenotype compared to other patients with variant at same residue (G362S). Epilepsy first recognized at 1 year of age. Developmental delay, mild bilateral ptosis, and inverted feet.	EEG: background slowing with frequent epileptiform activity. Extensive diagnostics including chromosomal microarray, biochemical studies, MRI, and MR spectroscopy were normal.	Vanstone et al. (2018)
c.1088G>A	p.Gly363Asp	Not stated: Chang et al. (2010) NM_012062.5 (isoform 1): Nolden et al. (2022)	De novo heterozygous	Middle	Shortly after birth	13 months	Elongated mitochondrial networks with fewer branch points. Elongated peroxisomes. Decreased DRP1 recruitment to both mitochondria and peroxisomes. Impaired DRP1 assembly. Increased GTP hydrolysis compared to WT DRP1. Recombinant protein well-folded by circular dichroism. Similar first Tm (GTPase domain) compared to WT DRP1 but abscence of 2nd Tm (stalk domain).	Patient born premature by C-section due to static growth. Remained very small for age. Microcephaly, arched eyebrows, upslanting palpebral fissures and slight micrognathia. Increased muscle tone. Developed infantile spasm at 15 weeks where they were admitted and experienced respiratory arrest.	High plasma and CSF lactate. MRI: hypoplasia of corpus callosum, mild benign external hydrocephalus. EEG: possible hypsarrhythmia. Echocardiogram: mild left ventricular hypertrophy.	Chang et al. (2010) - No patient Nolden et al. (2022)
c.1109T>G	p.Phe370Cys	NM_012062.5 NP_036192.2 (isoform 1)	De novo heterozygous dominant	Middle	5 years	Alive at time of publication	Increased DRP1 levels by westerm blot. Abnormally elongated mitochondria and aberrant peroxisomes. Yeast assay showed impaired growth.	Presented at age 5 for abrupt myoclonic status epilepticus during febrile episode. Repeat severe myoclonic or right prolonged hemiclonic SRSE with psychomotor deterioration. Epileptic encephalopathy	Abnormal distribution of mitochondria in muscle tissue in core like pattern. MRI at 3 years of age was normal. MRI at 7 years of age: global cortical atrophy prominent in both the right hemisphere and homolateral cerebral peduncle. Abnormal T2 high-intensity signal of deep white substance of the semioval white matter and in the paratrigonal site bilaterally.	Verrigni et al. (2019)
c.1135G>A	p.Glu379Lys	Not stated	De novo heterozygous dominant	Middle	4 days	10 months	Normal peroxisomal and mitochondrial network morphology.	Intrauterine growth restriction and hydrocephalus. Poor tone and apnea at birth.	MRI: microcephaly, volume loss with enlarged ventricles and loss of corpus callosum. Peristent metabolic lactic acidosis. No muscle biopsy or VLCFA analysis performed. Patient also found to have a p.Gly150Arg missense mutation in PDHA1.	Chao et al. (2016)
c.C1184>A	p.Ala395Asp	NM_012062.5 NP_036192.2 (isoform 1): Waterham et al. (2007) Not stated: Chang et al. (2010)	De novo heterozygous	Middle	6 days	37 days	Elongated mitochondria. Normal mitochondrial respiration. Fewer peroxisomes noted to be arranged in a linear formation in cells. Impaired DRP1 mitochondrial localization, self-assembly, and GTP hydrolysis.	Microcephaly and abnormal brain development. Neonatal lethal.	MRI: Abnormal gyral pattern associated with dysmyelination. EMG, echocardiography, and nerve conduction studies normal. Routine blood tests, as well as plasma sterol, serum transferrin glycoform, and acylcarnitine profiles normal. Thyroid and LFT normal. Blood lactate, plasma alanine concentrations, and cerotic acid levels elevated. Elevated CSF lactate, alanine, pyruvate, and protein.	Waterham et al. (2007) Chang et al. (2010) - No patient
c.1184C>G	p.Ala395Gly	Not stated	De novo heterozygous dominant	Middle	Early childhood	Alive at time of publication	Overexpression in DRP1 knockout cells displayed 75% of cells with WT mitochondrial morphology. Modest impairment of mitochondrial recruitement and higher-order assembly in the presence of WT DRP1.	Dysmorphic facies, GERD, hiatal hernia, ADHD, autistic like behaviors, developmental delay, developmental regression, and hypotonia. Muscle tone abnormalities that resolved/improved over time.	Not performed.	Whitley et al. (2018)
c.1201G>A	p.Gly401Ser	NM_012062.5 NP_036192.2 (isoform 1)	De novo heterozygous	Middle	Pt 1. Early infancy Pt 5. 2 years and 9 months	Pt 1. 10 months Pt 5. Alive at 3 years of age	Elongated mitochondrial networks with fewer branch points. Elongated peroxisomes. Decreased DRP1 recruitment to both mitochondria and peroxisomes. Impaired DRP1 assembly. Increased GTP hydrolysis compared to WT DRP1. Recombinant protein well-folded by circular dichroism. Similar first Tm (GTPase domain) compared to WT DRP1 but abscence of 2nd Tm (stalk domain).	Pt 1. Hypotonia and delayed motor milestones. Feeding difficulties with GERD. Non-dysmorphic. Small for age (2nd-9th percentile). Admitted at 10 months for reduced feeding, tiredness, rapid breathing, sweating, and pallor. Pt 5. Early onset epileptic encephalopathy with two episodes of status post epilepticus by 2 years and 9 months of age. Global developmental delay with significant delay in mot…	Pt 1. Echocardiography showed severe dilated cardiomyopathy with a dilated left ventricle and concentric left ventricular hypertrophy. Decreased left ventricular ejection fraction. Immunology, virology, and microbiology found no underlying cause for cardiomyopathy. Urinalysis and bloodspot acylcarnitines consistent with ketosis. MRI: thinning of the corpus callosum. Pt 5. Neurometabolic screening…	Nolden et al. (2022)
c.1207C>T	p.Arg403Cys	Not stated: Fahrner et al. (2016) NM_012062.5 NP_036192.2 (isoform 1): Verrigni et al. (2019) Not stated: Whitley et al. (2018) Not stated: Ryan et al. (2018)	De novo heterozygous dominant	Middle	4 years (patient 1) and 5 years (patient 2) (Fahrner et al., 2016) 6 years (patient 1) and 7 years (patient 2) (Whitley et al., 2018) 15 months (Verrigni et al., 2019) 13 years (Ryan et al., 2018)	Alive at time of publication (Verrigni et al., 2019)(Whitley et al., 2018)(Fahrner et al., 2016) 13 years (Ryan et al., 2018)	Hyperfused networks when expressed in Drp1 KO mouse embyronic fibroblast cells (MEFs). Decreased Drp1 recruitment and impaired mitochondrial fission in WT Drp1 MEFs. Loss of higher-order oligomerization (Fahrner et al., 2016). Normal DRP1 expression. (Verrigni et al., 2019). Stronger dominant negative phenotype than A395G or C431Y, but had normal DRP1 recruitment suggesting recruiter interactions…	Both patients exhibited early normal development followed by onset of refractory focal status epilepticus, encephalopathy, developmental regression, and myoclonus (Fahrner et al., 2016). Patient 1 exhibited developmental delay, regression, and hypotonia. Seizures, ataxia, spasticity, muscle tone abnormalities, and dysmorphic facies. Patient 2 exhibited seizures, spasticity, failure to thrive, myc…	Patient 1 - EEG: diffuse slowing with left central spikes. MRI: curvilinear diffusion changes in the left thalamus. MR angiogram normal. Extensive laboratory work that was normal. Autoimmune testing was negative. Enzyme testing of palmitoyl-protein thioesterase one and tripeptidyl peptidase one were normal. Muscle biopsy was normal. Patient 2 - EEG: diffuse cerebral disturbance with widespread ep…	Fahrner et al. (2016) Verrigni et al. (2019) Whitley et al. (2018) Ryan et al. (2018)
c.1217T>C	p.Leu406Ser	Not stated	De novo heterozygous dominant	Middle	6 months	18 months	Mitochondrial respiration reduced in muscle tissues. Immunocytochemistry showed defects of both mitochondrial and peroxisomal fission.	Severe hypotonia and spasms with no attainment of standard developmental milestones.	Elevated CSF lactate. Serial MRI: progressive atrophy. Post mortem brain pathology showed symmetrical neuronal necrosis with vascular proliferation.	Zaha et al. (2016)
c.1228G>A	p.Glu410Lys	Not stated	De novo heterozygous dominant	Middle	4 months	8 months	Light microscopy showed enlarged mitochondria in neurons and cardiac myocytes.	Septic optic dysplasia, hypotonia, developmental delay, severe mitochondrial cardiomyopathy, nonischemic CHF, and cardiogenic shock causing death.	Elevated blood lactate. Echocardiography: dilated left ventricle with decreased systolic function. Chest x-ray: pulmonary edema.	Vanderleur et al. (2019)
c.1292G>A	p.Cys431Tyr	Not stated	De novo heterozygous dominant	Middle	Infant	10 months	Hyperfused networks when expressed in DRP1 KO cells, but less severe impact on WT DRP1 function. Modest impairment of mitochondrial recruitement and higher-order assembly in presence of WT DRP1.	Neonatal lethal with seizures and failure to thrive. GERD, dysphagia, OSA, hepatomegaly, left hip dysplasia, and an atrial septal defect	Unknown	Whitley et al. (2018)
c.1337G>T	p.Cys446Phe	NM_005690.5 NP_005681.2 (isoform 3)	De novo heterozygous	Stalk	3 months	2.5 years	Decreased DRP1 C446F by Western Blot. Elongated mitochondrial networks with decreased number of mitochondria (70%). Decreased number of peroxisomes (50%) with an elongated, "beads on a string" appearance. Normal DRP1 oligomerization and mitochondrial recruitment.	Normal development until 3 months. Regression and global encephalopathy with infantile Parkinsonism like presentation including: prominent hypokinetic rigid syndrome, high amplitude rest tremors, and oculogyric crises. Died after sudden cardiac arrest.	Hyperlactacidemia, hyperlactatorrachia, and low homovanillic acid levels. Normal CSF 5-hydroxyindolacetic acid and GABA. Brain MR spectroscopy at 9 months and 22 months: progressive severe cortical-subcortical atrophy, hypomyelination, and a lactate peak. Normal EEG. Decreased complex I, II, and III with 62% mitochondrial DNA depletion.	Díez et al. (2017)
NA	p.Cys452Phe (mouse DRP1 - equivalent to p.Cys446Phe in human DRP1)	NM_012062.5 NP_036192.2 (isoform 1)	NA	Middle	NA	NA	Impaired mitochondrial fission, disassembly, mitophagy, failed bioenergetics, and inflammation.	NA	NA	Cahill et al. (2015)
c.2072A>G	p.Tyr691Cys	NM_012062.5 NP_036192.2 (isoform 1)	De novo heterozygous	GED	3 months	Alive at time of publication (27 years of age)	Unable to rescue Drosophila melanogaster drp1 mutants in lethality studies. Irregular peroxisomal morphology and clustering.	Born at term with hypotonia and nystagmus. Patient required a walker to ambulate at age 3, but later developed spasticity and became wheelchair bound. Verbal but with sentences fewer than 5 words. Complex seizures starting at 12 years and delayed menarche starting at 20 years. Cyclical vomiting. Encephalopathy, disability, and epilepsy.	EEG: background slowing without focal or lateralizing abnormalities and no epileptiform activity. Brain CT and MRI: cerebellar atrophy. Metabolic workup relatively normal. CSF analysis showed slightly decreased tetrahydrobiopterin but otherwise normal neurotransmitter levels	Batzir et al. (2019)
c.1532T>C, c.1085G>A	p.Ile512Thr, p.Gly362Asp	NM_012062.5 NP_036192.2 (isoform 1)	Compound heterozygous	Stalk and Variable Domain	Within months post birth	6 years	Abnormally elongated mitochondria and aberrant peroxisomes. Yeast assay showed normal growth.	Psychomotor delay apparent within first few months of life. Partial motor status epilepticus following viral illness at 5 years and 5 months of age with progression to refractory epilepsy and psychomotor regression. At 5 years and 9 months developed spastic tetraparesis, lack of postural control, hyperkinesis, and severe cognitive impairment. Motor axonal neuropathy.	MRI and EEG at 4 years: normal. MRI at 5 years and 6 months: T2 hyperintensities in thalami and right hemisphere. EEG at 5 years and 9 months: epilepsia partialis. MRI at 5 years and 9 months: global cerebral atrophy. Routine blood work, pyruvate, amino acids, VLCFA, phytanic acid, and urinary organic acids normal. Mildly elevated serum lactate. Muscle biopsy: abnormal distribution of mitochondri…	Verrigni et al. (2019)
c.2128A>G	p.Arg710Gly	NM_012062.5 NP_036192.2 (isoform 1)	De novo heterozygous	GED	5-9 years	17	Elongated mitochondrial networks with fewer branch points. Elongated peroxisomes. Decreased DRP1 recruitment to the mitochondria. Normal DRP1 recruitment to peroxisomes. Impaired DRP1 assembly, but to a lesser extent than G363D and G401S variants. Decreased GTP hydrolysis compared to WT. Recombinant protein well-folded with retention of GTPase and stalk domain stability. Lower Tm than WT DRP1.	Chronic inflammatory demyelinating polyneuropathy, extra pyramidal movement disorder, epilepsy (infrequent and not medicated), optic atrophy, fatigue, and episodic regression of developmental skills precipitated by infection. Dystonia. No independent mobility and used electric wheelchair. Good cognition and communication.	Brain MRI at 1 year and 2 years: normal. MRI of the brain at the age of 5 years: subtle abnormalities in the parasagittal region of both hemispheres, suggestive of ulegyria. EMG/Nerve conduction studies at 9 years old showed a severe underlying sensory motor peripheral neuropathy, along with findings indicative of a superimposed demyelinating neuropathy.	Nolden et al. (2022)
